# Supplementary material
Source: MDPI journal article supplement (https://www.mdpi.com/2071-1050/16/2/802)
Supplement: s1 [file s1]

## Supplementary tables

**Table S1.** Location of the weather stations used in this study and the period covered by the observation years (Figure 1).

| No | Climatological station | Altitude (m) | Latitude (°) | Longitude (°) | Period    |
|----|------------------------|--------------|--------------|---------------|-----------|
| 1  | Acatlán                | 1751         | 19.695833    | 96.8438890    | 1979-2018 |
| 2  | Actopan                | 250          | 19.502778    | 96.6111110    | 1952-2018 |
| 3  | Almolonga              | 730          | 19.588333    | 96.7841670    | 1970-2012 |
| 4  | Altotonga              | 1867         | 19.762500    | 97.2347220    | 1925-2018 |
| 5  | Atzalan                | 1697         | 19.788889    | 97.2458330    | 1924-2018 |
| 6  | Briones                | 1349         | 19.508333    | 96.9494440    | 1984-2018 |
| 7  | Coscomatepec           | 1530         | 19.071667    | 97.0461110    | 1947-2008 |
| 8  | El Coyotl              | 545          | 19.172222    | 96.6963890    | 1964-2009 |
| 9  | Huatusco               | 1186         | 19.146667    | 96.9500000    | 1980-2018 |
| 10 | Ingenio la Concepción  | 982          | 19.604722    | 96.8844440    | 1995-2018 |
| 11 | Ixhuacán               | 1802         | 19.348611    | 97.1083330    | 1980-2011 |
| 12 | Ixhuatlán del Café     | 1350         | 19.050000    | 96.9861110    | 1945-2012 |
| 13 | Jalacingo              | 1880         | 19.806111    | 97.3077780    | 1925-2013 |
| 14 | Jalcomulco             | 335          | 19.330000    | 96.7619440    | 1961-2012 |
| 15 | La Concepción          | 1000         | 19.604722    | 96.9000000    | 1974-2018 |
| 16 | La Joya                | 2175         | 19.610833    | 97.0272220    | 1985-2018 |
| 17 | Las Vigas              | 2426         | 19.638889    | 97.1097220    | 1922-2018 |
| 18 | Los Pescados           | 2395         | 19.561398    | 97.1480560    | 1964-2012 |
| 19 | Martínez de la Torre   | 89           | 20.079167    | 97.0638890    | 1954-2018 |
| 20 | Misantla               | 310          | 19.929167    | 96.8555560    | 1925-2018 |
| 21 | Naolinco de Victoria   | 1542         | 19.651944    | 96.8730560    | 1955-2018 |
| 22 | Naranjal               | 697          | 18.813889    | 96.9622220    | 1958-2011 |
| 23 | Perote                 | 2392         | 19.580833    | 97.2477780    | 1965-2018 |
| 24 | Rancho Viejo           | 914          | 19.446944    | 96.7836110    | 1969-2018 |
| 25 | Tembladeras            | 3102         | 19.512222    | 97.1180560    | 1965-2018 |
| 26 | Tenampa                | 1015         | 19.251667    | 96.8825000    | 1964-2005 |
| 27 | Tenochtitlán           | 892          | 19.811111    | 96.9166670    | 1999-2018 |
| 28 | Teocelo                | 1188         | 19.386111    | 96.9736110    | 1944-2018 |
| 29 | Totutla                | 1446         | 19.212500    | 96.9638890    | 1959-2018 |
| 30 | Villa Tejeda           | 348          | 19.022222    | 96.6138890    | 1982-2018 |
| 31 | Alcomunga              | 2485         | 18.430556    | 97.0250000    | 1956-2019 |
| 32 | San Bernardino Lagunas | 1693         | 18.603889    | 97.2725000    | 1955-2019 |
| 33 | Telpatlán              | 2212         | 18.528056    | 97.1447220    | 1955-2019 |
| 34 | Xalapa                 | 1138         | 19.550000    | 96.8500000    | 1951-2018 |

**Table S2.** Decrease/growth of coffee productivity (Mg yr<sup>-1</sup>, CP) in each of the 63 municipalities in the central zone of the state of Veracruz, Mexico. In general, almost all municipalities present a decline in productivity except for fourteen municipalities (numbers in bold) (p<0.05 and n = 20).

| No. | Municipality          | CP            | r <sup>2</sup> | No. | Municipality         | CP           | r <sup>2</sup> |
|-----|-----------------------|---------------|----------------|-----|----------------------|--------------|----------------|
| 1   | Actopan               | -41.37        | 0.58           | 33  | Mixtla de Altamirano | <b>4.88</b>  | 0.08           |
| 2   | Alto Lucero           | -198.78       | 0.79           | 34  | Naolinco             | <b>8.03</b>  | 0.006          |
| 3   | Altotonga             | -94.99        | 0.15           | 35  | Naranjal             | -138.79      | 0.68           |
| 4   | Amatlán de los Reyes  | -449.29       | 0.83           | 36  | Nautla               | -10.78       | 0.53           |
| 5   | Atoyac                | -156.20       | 0.27           | 37  | Omealca              | -13.88       | 0.17           |
| 6   | Atzalán               | <b>156.85</b> | 0.02           | 38  | Paso del Macho       | -32.69       | 0.48           |
| 7   | Chiconquiaco          | -9.31         | 0.004          | 39  | Rafael Delgado       | -6.89        | 0.80           |
| 8   | Chocaman              | -175.26       | 0.73           | 40  | Sochiapa             | -26.98       | 0.03           |
| 9   | Coatepec              | -932.30       | 0.68           | 41  | Tatatila             | -14.96       | 0.10           |
| 10  | Coetzala              | -64.40        | 0.64           | 42  | Tenampa              | -39.69       | 0.02           |
| 11  | Colipa                | <b>0.63</b>   | 0.0002         | 43  | Tenochtitlán         | <b>89.15</b> | 0.36           |
| 12  | Comapa                | -187.41       | 0.23           | 44  | Teocelo              | -294.57      | 0.60           |
| 13  | Cosautlán de Carvajal | -395.65       | 0.66           | 45  | Tepatlatxco          | -231.38      | 0.48           |
| 14  | Coscomatepec          | <b>1.17</b>   | 0.019          | 46  | Tepetlán             | -4.52        | 0.0043         |
| 15  | Cuichapa              | -26.66        | 0.40           | 47  | Tequila              | <b>30.6</b>  | 0.076          |
| 16  | Córdoba               | -421.93       | 0.78           | 48  | Texhuacán            | -0.45        | 0.013          |
| 17  | Emiliano Zapata       | -411.68       | 0.55           | 49  | Tezonapa             | -582.11      | 0.46           |
| 18  | Fortín                | -402.63       | 0.83           | 50  | Tlacotepec de Mejía  | -31.11       | 0.06           |
| 19  | Huatusco              | -502.11       | 0.22           | 51  | Tlaltetela           | -141.11      | 0.12           |
| 20  | Ixhuacán de los Reyes | -68.34        | 0.73           | 52  | Tlapacoyan           | -142.96      | 0.45           |
| 21  | Ixhuatlán del Café    | -291.71       | 0.14           | 53  | Tlilapan             | -13.52       | 0.75           |
| 22  | Ixtaczoquitlán        | -360.93       | 0.8            | 54  | Tomatlán             | -20.42       | 0.05           |
| 23  | Jalacingo             | -11.69        | 0.054          | 55  | Tonayán              | -3.20        | 0.44           |
| 24  | Jalcomulco            | -27.65        | 0.703          | 56  | Totutla              | -190.67      | 0.06           |
| 25  | Jilotepec             | <b>31.18</b>  | 0.030          | 57  | Vega de Alatorre     | <b>14.18</b> | 0.32           |
| 26  | Juchique de Ferrer    | <b>10.23</b>  | 0.0005         | 58  | Xalapa               | -219.77      | 0.73           |
| 27  | Las Minas             | -10.85        | 0.25           | 59  | Xico                 | -297.74      | 0.45           |
| 28  | Los Reyes             | <b>1.74</b>   | 0.018          | 60  | Yanga                | -10.07       | 0.30           |
| 29  | Magdalena             | <b>1.33</b>   | 0.048          | 61  | Yecuatla             | -25.68       | 0.02           |
| 30  | Martínez de la Torre  | -14.02        | 0.539          | 62  | Zentla               | -305.43      | 0.30           |
| 31  | Miahuatlán            | -1.29         | 0.024          | 63  | Zongolica            | <b>80.75</b> | 0.02           |
| 32  | Misantla              | <b>23.87</b>  | 0.004          |     |                      |              |                |
